# Supplementary material
Source: PubMed Central journal article supplement (PMC3722864)
Supplement: NIHMS474006-supplement-supplement_1.pdf [file NIHMS474006-supplement-supplement_1.pdf]

## Supplementary Material

### STRP definitions

The *ADH1B* upstream STRP was identified in a search of Genbank sequence (Accession Numbers AC015614.3 for the clone and AP002027.1 for the BAC). The downstream STRP was discovered by sequencing a clone (Osier, 2002) and confirmed as polymorphic using PCR.

The STRPs were typed using fluorescently labeled primers for PCR amplification followed by electrophoresis of the denatured products on an ABI 377 Automatic DNA Sequencer. The primers used are as follows: *ADH1B* upstream (GTAT)<sub>n</sub> 6-FAM-GCCTTTTGCCCTACTTTGTAT, and GAGTGAGACACTGTCTCATAA; *ADH1B* downstream (TA)<sub>n</sub> 6-FAM-GCATGTGGAGCCTTCT, and GACCCAGCCAATACTTTCTAC. These primers also serve to locate the STRPs in the human genome sequence.

The repeat numbers of the STRPs were determined by resequencing PCR products of several different sizes.

Osier, M.V. (2002) *Genetic Variation and Linkage Disequilibrium in the Human Alcohol Dehydrogenase genes: implications of the evolutionary history of a gene family in humans*. A dissertation from Department of Genetics, The Graduate School, Yale University, New Haven, CT.
